# Supplementary material
Source: PubMed Central journal article supplement (PMC5710236)
Supplement: jamapsychiatry-74-924-s001.pdf [file jamapsychiatry-74-924-s001.pdf]

[Type here]

## Supplementary Online Content

Ursano RJ, Kessler RC, Naifeh JA, et al; Army Study to Assess Risk and Resilience in Servicemembers (STARRS). Risk of suicide attempt among soldiers in army units with a history of suicide attempts. *JAMA Psychiatry*. Published online July 26, 2017.  
doi:10.1001/jamapsychiatry.2017.1925

**eTable 1.** List and Brief Descriptions of Administrative Data Systems Included in the 2004-2009 Army STARRS Historical Administrative Data Study (HADS)

**eTable 2.** List of Military Occupational Specialties Categorized as “Combat Arms” in the Current Study

**eTable 3.** *International Classification of Diseases, Ninth Revision–Clinical Modification (ICD-9-CM)* Codes Used to Identify Mental Disorders.

**eTable 4.** Sociodemographic and Service-Related Characteristics Among Regular Army Enlisted Soldiers, 2004-2009

**eTable 5.** Multivariate Associations of Unit Suicide Attempts and Service-Related Variables With Suicide Attempts Among Regular Army Enlisted Soldiers

**eAppendix.** Supplemental Methods

This supplementary material has been provided by the authors to give readers additional information about their work.

[Type here]

**eTable 1.** List and Brief Descriptions of Administrative Data Systems Included in the 2004-2009 Army STARRS Historical Administrative Data Study (HADS)

| Database Acronym                               | Description                                                                                                                                                                                                                                                                                                                                                                                                                                                                                                                                                                                                                                                                                                                                                                                                                                                                                                                                           |
|------------------------------------------------|-------------------------------------------------------------------------------------------------------------------------------------------------------------------------------------------------------------------------------------------------------------------------------------------------------------------------------------------------------------------------------------------------------------------------------------------------------------------------------------------------------------------------------------------------------------------------------------------------------------------------------------------------------------------------------------------------------------------------------------------------------------------------------------------------------------------------------------------------------------------------------------------------------------------------------------------------------|
| DCIPS                                          | DEFENSE CASUALTY INFORMATION PROCESSING SYSTEM (DCIPS): Casualty data system for Army, Navy, Air Force, and Marines. It contains information on all casualties including deceased active duty members (and cause of death).                                                                                                                                                                                                                                                                                                                                                                                                                                                                                                                                                                                                                                                                                                                           |
| DMDC/CTS                                       | DEFENSE MANPOWER DATA CENTER (DMDC) / CONTINGENCY TRACKING SYSTEM (CTS): Collection of activation, mobilization, and deployment data. Provides information to DoD decision makers and includes a CTS Deployment File used for tracking the location of deployed personnel.                                                                                                                                                                                                                                                                                                                                                                                                                                                                                                                                                                                                                                                                            |
| DMDC/Master Personnel & DMDC/Transaction files | DEFENSE MANPOWER DATA CENTER (DMDC) / MASTER PERSONNEL & TRANSACTION FILES: The Active Duty Master File provides an inventory of all individuals on active duty (excluding reservists on active duty for training) at a point in time. It is a standardized and centralized database of present and past members of the active duty force. Personal data elements include social security number, education level, home of record, date of birth, marital status, number of dependents, race, ethnic group, and name. Military data elements include Service, pay grade, Armed Forces Qualification Test percentile (enlisted only), source of commission (officers only), military primary duty and secondary occupation, Unit Identification Code, months of service, duty location, Estimated Termination of Service date, basic active service date, date of current rank, pay entry base date, foreign language ability, and major command code. |
| DODSER                                         | DEPARTMENT OF DEFENSE SUICIDE EVENT REPORT (DODSER): Provides risk and protective factor information for suicide events. This file contains non-fatal attempts, completed suicides, and suicide ideation cases.                                                                                                                                                                                                                                                                                                                                                                                                                                                                                                                                                                                                                                                                                                                                       |
| MDR                                            | MILITARY HEALTH SYSTEM DATA REPOSITORY (MDR): This database contains information about medical, dental, pharmaceutical, and ancillary claims data for both in network and purchased care as well as both inpatient and outpatient treatment. Data are collected on both Army personnel and their beneficiaries.                                                                                                                                                                                                                                                                                                                                                                                                                                                                                                                                                                                                                                       |
| DMDC/DEERS                                     | DEFENSE MANPOWER DATA CENTER (DMDC) / DEFENSE ENROLLMENT ELIGIBILITY REPORTING SYSTEM (DEERS): A DoD PDR containing personnel data and data related to DoD affiliation, benefits, employment, and pay.                                                                                                                                                                                                                                                                                                                                                                                                                                                                                                                                                                                                                                                                                                                                                |
| TMDS                                           | THEATER MEDICAL DATA STORE (TMDS): Used to track, analyze, view and manage Soldier medical treatment information recorded in the theater of operations. Features of TMDS: accessibility and visibility of service members' deployed medical records, outpatient and inpatient treatment records created in theater facilities, treatment records from other applications, reports on movement of patients, patient status and injury/illnesses.                                                                                                                                                                                                                                                                                                                                                                                                                                                                                                       |

[Type here]

|         |                                                                                                                                                             |
|---------|-------------------------------------------------------------------------------------------------------------------------------------------------------------|
|         |                                                                                                                                                             |
| TRAC2ES | TRANSCOM REGULATING AND COMMAND AND CONTROL EVACUATION SYSTEM (TRAC2ES): A tracking system for all medical transfers across the world for all DOD services. |

[Type here]

**eTable 2.** List of Military Occupational Specialties Categorized as “Combat Arms” in the Current Study

| <b>Combat Arms</b> |      |                                  |
|--------------------|------|----------------------------------|
|                    | E11B | Infantryman                      |
|                    | E11C | Indirect Fire Infantryman        |
|                    | E11Z | Infantry Senior Sergeant         |
|                    | E13B | Cannon Crewmember                |
|                    | E13E | Cannon Fire Direction Specialist |
|                    | E13F | Fire Support Specialist          |
|                    | E13S | Field Artillery Surveyor         |
|                    | E19D | Cavalry Scout                    |
|                    | E19K | M1 Armor Crewman                 |
|                    | E19Z | Armor Senior Sergeant            |

[Type here]

**eTable 3. International Classification of Diseases, Ninth Revision—Clinical Modification (ICD-9-CM) Codes Used to Identify Mental Disorders**

| Included Mental Health Diagnoses                                          | ICD-9-CM Codes                                                                                                                                                                                                |
|---------------------------------------------------------------------------|---------------------------------------------------------------------------------------------------------------------------------------------------------------------------------------------------------------|
| Adjustment Disorder                                                       | 309, .29, .3, .4, .82, .83, .89, .9                                                                                                                                                                           |
| Dysthymic Disorder/<br>Neurasthenia/ Depression NOS                       | 296.82, .90, .99<br>300.4, .5<br>309.0, .1<br>311, .0, .1<br>313.1                                                                                                                                            |
| Major Depression                                                          | 296.2, .20, .21, .22, .23, .24, .25, .26, .3, .30, .31, .32, .33, .34, .35, .36                                                                                                                               |
| Bipolar Disorder                                                          | 296.00, .01, .02, .03, .04, .05, .06, .10, .11, .12, .13, .14, .15, .16, .40, .41, .42, .43, .44, .45, .46, .50, .51, .52, .53, .54, .55, .56, .60, .61, .62, .63, .64, .65, .66, .7, .80, .81, .89<br>301.13 |
| Anxiety State/ Anxiety Disorder                                           | 300, .00, .01, .02, .09, .20, .21, .22, .23, .29, .3<br>309.21, .24, .28<br>313.0, .21, .22, .23                                                                                                              |
| Post-Traumatic Stress Disorder                                            | 309.81                                                                                                                                                                                                        |
| ADHD/ Learning Disorders                                                  | 314.0, .00, .01, .1, .2, .8, .9<br>315.00, .01, .02, .09, .1, .2, .3, .31, .32, .34, .39, .4, .5, .8, .9                                                                                                      |
| Conduct Disorder/ Oppositional<br>Defiant Disorder                        | 301.7<br>312.4, .8, .81, .82, .89, .9<br>313.81<br>V62.83                                                                                                                                                     |
| Eating Disorders                                                          | 307.1, .50, .51, .59                                                                                                                                                                                          |
| Other Impulse Control Disorders                                           | 312.00, .01, .02, .03, .10, .11, .12, .13, .20, .21, .22, .23, .3, .30, .31, .32, .33, .34, .35, .39                                                                                                          |
| Alcohol Induced Mental<br>Disorders/ Alcohol Dependence/<br>Alcohol Abuse | 291.0, .1, .2, .3, .4, .5, .8, .81, .82, .89, .9<br>303.00, .01, .02, .03, .9, .90, .91, .92, .93                                                                                                             |

[Type here]

|                                        |                                                                                                                                                                                                                                                                                                                                                                                     |
|----------------------------------------|-------------------------------------------------------------------------------------------------------------------------------------------------------------------------------------------------------------------------------------------------------------------------------------------------------------------------------------------------------------------------------------|
|                                        | 305, .0, .00, .01, .02, .03                                                                                                                                                                                                                                                                                                                                                         |
|                                        |                                                                                                                                                                                                                                                                                                                                                                                     |
| Drug Induced Mental Disorders          | 292                                                                                                                                                                                                                                                                                                                                                                                 |
|                                        |                                                                                                                                                                                                                                                                                                                                                                                     |
| Non-Dependent Drug Abuse               | 305.2, .20, .21, .22, .23, .3, .30, .31, .32, .33, .4, .40, .41, .42, .43, .5, .50, .51, .52, .53, .6, .60, .61, .62, .63, .7, .70, .71, .72, .73, .8, .80, .81, .82, .83, .9, .90, .91, .92, .93                                                                                                                                                                                   |
|                                        |                                                                                                                                                                                                                                                                                                                                                                                     |
| Drug dependence                        | 304                                                                                                                                                                                                                                                                                                                                                                                 |
|                                        |                                                                                                                                                                                                                                                                                                                                                                                     |
| Personality Disorders                  | 301.0, .1, .10, .11, .12, .20, .21, .22, .3, .4, .50, .51, .59, .6, .8, .80, .81, .82, .83, .84, .89, .9                                                                                                                                                                                                                                                                            |
|                                        |                                                                                                                                                                                                                                                                                                                                                                                     |
| Non-Affective Psychosis                | 295.00, .01, .02, .03, .04, .05, .10, .11, .12, .13, .14, .15, .20, .21, .22, .23, .24, .25, .30, .31, .32, .33, .34, .35, .40, .41, .42, .43, .44, .45, .50, .51, .52, .53, .54, .60, .61, .62, .63, .64, .65, .70, .71, .72, .73, .74, .75, .80, .81, .82, .83, .84, .85, .90, .91, .92, .93, .94, .95<br><br>297.0, .1, .2, .3, .8, .9<br><br>298.0, .1, .2, .3, .4, .8, .9, .90 |
|                                        |                                                                                                                                                                                                                                                                                                                                                                                     |
| Somatoform/ Dissociative Disorders     | 300.10, .11, .12, .13, .14, .15, .16, .19, .6, .7, .80, .81, .82, .89<br><br>306.0, .1, .2, .3, .4, .50, .51, .52, .53, .59, .6, .7, .8, .9<br><br>307.54, .80, .81, .89                                                                                                                                                                                                            |
|                                        |                                                                                                                                                                                                                                                                                                                                                                                     |
| Organic Mental Disorders               | 290.0, .10, .11, .12, .13, .20, .21, .3, .40, .41, .42, .43, .8, .9<br><br>293.0, .1, .81, .82, .83, .84, .89, .89, .9<br><br>294.0, .1, .10, .11, .8, .9<br><br>307.20, .21, .22, .23, .3<br><br>310.0, .8, .9<br><br>317<br><br>318.0, .1, 2<br><br>319                                                                                                                           |
|                                        |                                                                                                                                                                                                                                                                                                                                                                                     |
| Sexual Disorders                       | 302, .0, .1, .2, .3, .4, .50, .51, .52, .53, .6, .70, .71, .72, .73, .74, .75, .76, .79, .81, .82, .83, .84, .85, .89, .9                                                                                                                                                                                                                                                           |
|                                        |                                                                                                                                                                                                                                                                                                                                                                                     |
| Sleep Disorders                        | 307.4, .40, .41, .42, .43, .44, .45, .46, .47, .48, .49                                                                                                                                                                                                                                                                                                                             |
|                                        |                                                                                                                                                                                                                                                                                                                                                                                     |
| Other Mental Disorders/ Mental Illness | 292.85<br><br>299.00, .01, .10, .80, .81, .90, .91                                                                                                                                                                                                                                                                                                                                  |

[Type here]

|                                                     |                                                                                                                                                                                                                                                                                               |
|-----------------------------------------------------|-----------------------------------------------------------------------------------------------------------------------------------------------------------------------------------------------------------------------------------------------------------------------------------------------|
|                                                     | 300.9<br>307.0, .52, .53, .6, .7, .9<br>309.22<br>310.1<br>313.3, .82, .89, .9<br>316                                                                                                                                                                                                         |
| Traumatic Stress                                    | 308, .0, .1, .2, .3, .4, .9                                                                                                                                                                                                                                                                   |
|                                                     |                                                                                                                                                                                                                                                                                               |
| <b>Excluded Mental Health Diagnoses</b>             | <b>ICD-9-CM Codes</b>                                                                                                                                                                                                                                                                         |
| Postconcussion Syndrome                             | 310.2                                                                                                                                                                                                                                                                                         |
| Tobacco Use Disorder                                | 305.1, .10, .11, .12, .13                                                                                                                                                                                                                                                                     |
| Symptoms, Signs, and Ill-Defined Conditions, Mental | 797<br>798, .0, .1, .2, .9<br>799, .0, .01, .02, .1, .2, .21, .22, .23, .24, .25, .29, .3, .4, .8, .81, .82, .89, .9                                                                                                                                                                          |
| Stressors/ Adversities                              | V40.0, .00, .1, .2, .20, .3, .30, .9, .90<br>V61, .0, .01, .02, .03, .04, .05, .06, .07, .08, .09, .2, .20, .21, .22, .23, .24, .29, .3, .4, .41, .42, .49, .8, .9<br>V62, .0, .1, .10, .2, .20, .21, .22, .29, .3, .4, .5, .8, 80, .81, .810, .811, .812, .82, .89, .9, .90<br>V69.4, .5, .9 |
| Marital Problems                                    | V61.1, .10, .11, .12                                                                                                                                                                                                                                                                          |
| Prior History of Mental Disorders                   | V11.0, .1, .2, .3, .8, .80, .9, .90<br>V66.3<br>V67.3                                                                                                                                                                                                                                         |
| Indicator of Impulsivity and Risky Behavior         | V69.2, .3                                                                                                                                                                                                                                                                                     |
| Self-Damaging Behavior                              | V69.8                                                                                                                                                                                                                                                                                         |
|                                                     |                                                                                                                                                                                                                                                                                               |

[Type here]



[Type here]

**eTable 4.** Sociodemographic and Service-Related Characteristics Among Regular Army Enlisted Soldiers, 2004-2009<sup>1</sup>

|                                        | <b>Weighted Proportion (%)</b> | <b>Unweighted Person-Months (N = 161,038)</b> | <b>Weighted Person-Months (N = 30,314,712)</b> |
|----------------------------------------|--------------------------------|-----------------------------------------------|------------------------------------------------|
| <b>Demographic Characteristics</b>     |                                |                                               |                                                |
| <b>Gender</b>                          |                                |                                               |                                                |
| Male                                   | 86.4                           | 137,987                                       | 26,179,724                                     |
| Female                                 | 13.6                           | 23,051                                        | 4,134,988                                      |
| <b>Current Age</b>                     |                                |                                               |                                                |
| < 21 years                             | 15.0                           | 26,023                                        | 4,555,860                                      |
| 21-24                                  | 30.2                           | 49,172                                        | 9,146,457                                      |
| 25-29                                  | 23.2                           | 36,932                                        | 7,042,130                                      |
| 30-34                                  | 13.8                           | 21,551                                        | 4,185,626                                      |
| 35-39                                  | 10.8                           | 16,683                                        | 3,277,895                                      |
| 40+                                    | 6.9                            | 10,677                                        | 2,106,744                                      |
| <b>Race/Ethnicity</b>                  |                                |                                               |                                                |
| White                                  | 59.8                           | 97,316                                        | 18,127,711                                     |
| Black                                  | 22.7                           | 35,762                                        | 6,874,198                                      |
| Hispanic                               | 11.6                           | 18,503                                        | 3,508,366                                      |
| Asian                                  | 4.0                            | 6,291                                         | 1,202,480                                      |
| Other                                  | 2.0                            | 3,166                                         | 601,957                                        |
| <b>Education</b>                       |                                |                                               |                                                |
| < High school <sup>2</sup>             | 12.7                           | 22,033                                        | 3,838,256                                      |
| High school                            | 76.6                           | 122,302                                       | 23,210,083                                     |
| Some college                           | 5.5                            | 8,546                                         | 1,671,987                                      |
| College+                               | 5.3                            | 8,157                                         | 1,594,386                                      |
| <b>Marital Status</b>                  |                                |                                               |                                                |
| Never married                          | 41.0                           | 67,409                                        | 12,416,951                                     |
| Currently married                      | 54.8                           | 86,938                                        | 16,605,928                                     |
| Previously married                     | 4.3                            | 6,691                                         | 1,291,833                                      |
| <b>Service-Related Characteristics</b> |                                |                                               |                                                |
| <b>Age at Army Entry</b>               |                                |                                               |                                                |
| < 21                                   | 62.2                           | 100,580                                       | 18,846,778                                     |
| 21-24                                  | 24.5                           | 39,272                                        | 7,434,908                                      |
| ≥ 25                                   | 13.3                           | 21,186                                        | 4,033,026                                      |
| <b>Time in Service</b>                 |                                |                                               |                                                |
| 1-2 years                              | 27.8                           | 47,509                                        | 8,441,130                                      |
| 3-4 years                              | 22.3                           | 36,067                                        | 6,763,859                                      |
| 5-10 years                             | 27.2                           | 42,673                                        | 8,232,717                                      |
| >10 years                              | 22.7                           | 34,789                                        | 6,877,006                                      |
| <b>Deployment Status</b>               |                                |                                               |                                                |
| Never deployed                         | 40.3                           | 66,820                                        | 12,212,586                                     |
| Currently deployed                     | 23.5                           | 36,541                                        | 7,122,135                                      |
| Previously deployed                    | 36.2                           | 57,677                                        | 10,979,991                                     |
| <b>Military Occupation</b>             |                                |                                               |                                                |
| Combat Arms                            | 23.3                           | 37,853                                        | 7,076,284                                      |

[Type here]

|                                               |       |         |            |
|-----------------------------------------------|-------|---------|------------|
| Other                                         | 76.7  | 123,185 | 23,238,428 |
| <b>Unit Size (Number of Soldiers)</b>         |       |         |            |
| 1-40                                          | 9.9   | 15,847  | 2,944,678  |
| 41-100                                        | 27.4  | 44,286  | 8,306,766  |
| 101-200                                       | 42.8  | 69,016  | 12,988,295 |
| 201-600                                       | 19.9  | 31,889  | 6,024,973  |
| <b>Unit Suicide Attempts in the Past Year</b> |       |         |            |
| 0                                             | 74.5  | 118,473 | 22,592,538 |
| 1                                             | 13.6  | 22,218  | 4,109,081  |
| 2                                             | 5.9   | 9,894   | 1,799,501  |
| 3                                             | 2.7   | 4,572   | 817,089    |
| 4                                             | 1.4   | 2,347   | 412,088    |
| 5+                                            | 1.9   | 3,534   | 584,415    |
|                                               |       |         |            |
| <b>Suicide Attempt</b>                        |       |         |            |
| Yes                                           | 0.0   | 9,512   | 9,512      |
| No                                            | 100.0 | 151,526 | 30,305,200 |

<sup>1</sup>The sample of enlisted soldiers (n=9,650 cases, 153,528 control person-months) is a subset of the total sample (n=193,617 person-months) from the Army STARRS Historical Administrative Data Study (HADS) that includes all Regular Army soldiers (i.e., excluding those in the U.S. Army National Guard and Army Reserve) with a suicide attempt in their administrative records during the years 2004-2009, plus a 1:200 stratified probability sample of all other active duty Regular Army person-months in the population exclusive of soldiers with a suicide attempt or other non-fatal suicidal event (e.g., suicidal ideation) and person-months associated with death (i.e., suicides, combat deaths, homicides, and deaths due to other injuries or illnesses). All records in the 1:200 sample were assigned a weight of 200 to adjust for the under-sampling of months not associated with suicide attempt.

[Type here]

**eTable 5. Multivariate Associations of Unit Suicide Attempts, Other Unit Characteristics, and Service-Related Variables With Suicide Attempts Among Regular Army Enlisted Soldiers<sup>1,2</sup>**

|                                               | <b>OR</b> | <b>(95% CI)</b> |
|-----------------------------------------------|-----------|-----------------|
| <b>Military Occupation</b>                    |           |                 |
| Combat Arms                                   | 1.1*      | (1.1–1.2)       |
| Other                                         | 1.0       | –               |
| $\chi^2_1$                                    | 24.3*     |                 |
| <b>Unit Size</b>                              |           |                 |
| 1–40                                          | 1.4*      | (1.3–1.5)       |
| 41–100                                        | 1.3*      | (1.2–1.3)       |
| 101–200                                       | 1.1*      | (1.0–1.1)       |
| 201–600                                       | 1.0       | –               |
| $\chi^2_3$                                    | 85.4*     |                 |
| <b>Mental Health Diagnosis History</b>        |           |                 |
| No                                            | 1.0       | –               |
| Yes                                           | 6.7*      | (6.4–7.0)       |
| $\chi^2_1$                                    | 7,169.7*  |                 |
| <b>Unit Suicide Deaths in the Past Year</b>   |           |                 |
| 0                                             | 1.0       | –               |
| 1+                                            | 0.9       | (0.8–1.0)       |
| $\chi^2_1$                                    | 3.7       |                 |
| <b>Unit Combat Deaths in the Past Year</b>    |           |                 |
| 0                                             | 1.0       | –               |
| 1                                             | 1.0       | (0.9–1.1)       |
| 2                                             | 0.9       | (0.7–1.2)       |
| 3                                             | 0.9       | (0.6–1.3)       |
| 4                                             | 1.0       | (0.7–1.6)       |
| 5                                             | 0.9       | (0.5–1.7)       |
| 6+                                            | 0.8       | (0.3–1.7)       |
| $\chi^2_6$                                    | 0.9       |                 |
| <b>Unit Accident Deaths in the Past Year</b>  |           |                 |
| 0                                             | 1.0       | –               |
| 1                                             | 0.9       | (0.9–1.0)       |
| 2+                                            | 0.9       | (0.7–1.3)       |
| $\chi^2_2$                                    | 1.3       |                 |
| <b>Unit Suicide Attempts in the Past Year</b> |           |                 |
| 0                                             | 1.0       | –               |
| 1                                             | 1.3*      | (1.3–1.4)       |
| 2                                             | 1.4*      | (1.3–1.5)       |
| 3                                             | 1.5*      | (1.3–1.6)       |
| 4                                             | 1.7*      | (1.5–1.9)       |
| 5+                                            | 2.0*      | (1.8–2.1)       |
| $\chi^2_5$                                    | 347.8*    |                 |

[Type here]

<sup>1</sup>The sample of enlisted soldiers (n=9,650 cases, 153,528 control person-months) is a subset of the total sample (n=193,617 person-months) from the Army STARRS Historical Administrative Data Study (HADS) that includes all Regular Army soldiers (i.e., excluding those in the U.S. Army National Guard and Army Reserve) with a suicide attempt in their administrative records during the years 2004-2009, plus a 1:200 stratified probability sample of all other active duty Regular Army person-months in the population exclusive of soldiers with a suicide attempt or other non-fatal suicidal event (e.g., suicidal ideation) and person-months associated with death (i.e., suicides, combat deaths, homicides, and deaths due to other injuries or illnesses). All records in the 1:200 sample were assigned a weight of 200 to adjust for the under-sampling of months not associated with suicide attempt.

<sup>2</sup>Logistic regression model included sociodemographics (gender, current age, race/ethnicity, education, marital status), service-related variables (age at entry into the Army, time in service, deployment status, military occupation, unit size, unit suicide attempts, unit suicide deaths, unit combat deaths, unit accident deaths), and history of mental health diagnosis. The models also included a dummy predictor variable for calendar month and year to control for secular trends.

[Type here]

## **eAppendix.** Supplemental Methods

### **Identification of units for analysis**

The Unit Identification Code (UIC) of each Soldier in a given month was used to group the person-month records in the study sample. The UICs for duty units were used in this analysis. The UIC is a 6-digit alpha-numeric code. Due to the sensitive nature of Army units, the UIC was encrypted to become a 10-digit alpha-numeric code. Missing UICs values were imputed by carrying available information forward or backward over a Soldier's career.
